# Supplementary material
Source: PubMed Central journal article supplement (PMC6461486)
Supplement: NIHMS1014550-supplement-2.pdf [file NIHMS1014550-supplement-2.pdf]

Supplementary Materials for  
“Analysis of combined incident and prevalent cohort data  
under a proportional mean residual life model”

Chi Hyun Lee, Jing Ning, Richard J. Kryscio, and Yu Shen

**Supplementary Figures**

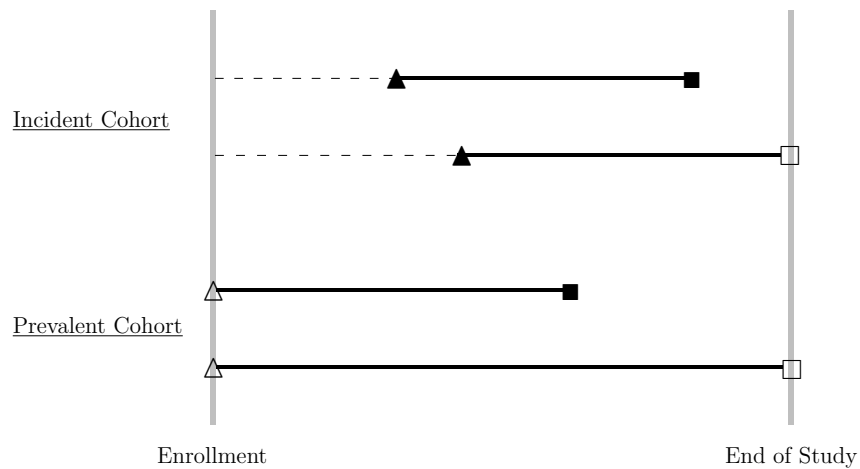

Figure S1: Combined incident and prevalent cohort data from the Nun Study. The observed time of dementia diagnosis (▲), the observed time of death (■), the left-censored time of dementia diagnosis (△), and the right-censored time of death (□).

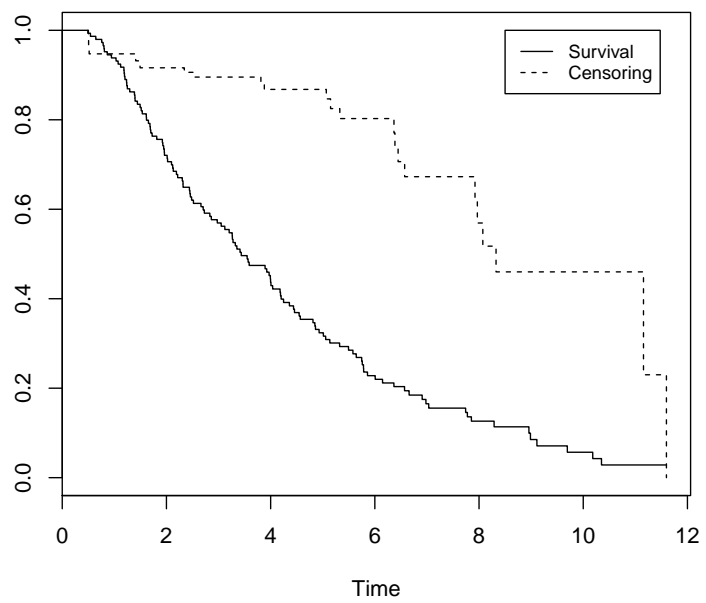

Figure S2: The estimated survival and censoring distributions.
